# Supplementary material
Source: publisher figshare collection journal article supplement (https://acs.figshare.com/ndownloader/files/3917347)
Supplement: Supplementary file 1 [file 3917347]

 
data_shelxl 
 
_audit_creation_method            SHELXL-97 
_chemical_name_systematic 
; 
 ? 
; 
_chemical_name_common             ? 
_chemical_melting_point           ? 
_chemical_formula_moiety          ? 
_chemical_formula_sum 
 'C22 H18 O6 S' 
_chemical_formula_weight          410.42 
 
loop_ 
 _atom_type_symbol 
 _atom_type_description 
 _atom_type_scat_dispersion_real 
 _atom_type_scat_dispersion_imag 
 _atom_type_scat_source 
 'C'  'C'   0.0033   0.0016 
 'International Tables Vol C Tables 4.2.6.8 and 6.1.1.4' 
 'H'  'H'   0.0000   0.0000 
 'International Tables Vol C Tables 4.2.6.8 and 6.1.1.4' 
 'O'  'O'   0.0106   0.0060 
 'International Tables Vol C Tables 4.2.6.8 and 6.1.1.4' 
 'S'  'S'   0.1246   0.1234 
 'International Tables Vol C Tables 4.2.6.8 and 6.1.1.4' 
 
_symmetry_cell_setting            ? 
_symmetry_space_group_name_H-M    ? 
 
loop_ 
 _symmetry_equiv_pos_as_xyz 
 'x, y, z' 
 '-x, -y, -z' 
 
_cell_length_a                    8.8819(17) 
_cell_length_b                    13.355(3) 
_cell_length_c                    16.688(3) 
_cell_angle_alpha                 102.679(5) 
_cell_angle_beta                  97.844(6) 
_cell_angle_gamma                 90.512(5) 
_cell_volume                      1911.6(6) 
_cell_formula_units_Z             4 
_cell_measurement_temperature     293(2) 
_cell_measurement_reflns_used     ? 
_cell_measurement_theta_min       ? 
_cell_measurement_theta_max       ? 
 
_exptl_crystal_description        ? 
_exptl_crystal_colour             ? 
_exptl_crystal_size_max           ? 
_exptl_crystal_size_mid           ? 
_exptl_crystal_size_min           ? 
_exptl_crystal_density_meas       ? 
_exptl_crystal_density_diffrn     1.426 
_exptl_crystal_density_method     'not measured' 
_exptl_crystal_F_000              856 
_exptl_absorpt_coefficient_mu     0.207 
_exptl_absorpt_correction_type    ? 
_exptl_absorpt_correction_T_min   ? 
_exptl_absorpt_correction_T_max   ? 
_exptl_absorpt_process_details    ? 
 
_exptl_special_details 
; 
 ? 
; 
 
_diffrn_ambient_temperature       293(2) 
_diffrn_radiation_wavelength      0.71073 
_diffrn_radiation_type            MoK\a 
_diffrn_radiation_source          'fine-focus sealed tube' 
_diffrn_radiation_monochromator   graphite 
_diffrn_measurement_device_type   ? 
_diffrn_measurement_method        ? 
_diffrn_detector_area_resol_mean  ? 
_diffrn_standards_number          ? 
_diffrn_standards_interval_count  ? 
_diffrn_standards_interval_time   ? 
_diffrn_standards_decay_%         ? 
_diffrn_reflns_number             27983 
_diffrn_reflns_av_R_equivalents   0.0275 
_diffrn_reflns_av_sigmaI/netI     0.0364 
_diffrn_reflns_limit_h_min        -10 
_diffrn_reflns_limit_h_max        12 
_diffrn_reflns_limit_k_min        -18 
_diffrn_reflns_limit_k_max        17 
_diffrn_reflns_limit_l_min        -23 
_diffrn_reflns_limit_l_max        24 
_diffrn_reflns_theta_min          1.56 
_diffrn_reflns_theta_max          31.43 
_reflns_number_total              10449 
_reflns_number_gt                 6992 
_reflns_threshold_expression      >2sigma(I) 
 
_computing_data_collection        ? 
_computing_cell_refinement        ? 
_computing_data_reduction         ? 
_computing_structure_solution     'SHELXS-97 (Sheldrick, 1990)' 
_computing_structure_refinement   'SHELXL-97 (Sheldrick, 1997)' 
_computing_molecular_graphics     ? 
_computing_publication_material   ? 
 
_refine_special_details 
; 
 Refinement of F^2^ against ALL reflections.  The weighted R-factor wR and 
 goodness of fit S are based on F^2^, conventional R-factors R are based 
 on F, with F set to zero for negative F^2^. The threshold expression of 
 F^2^ > 2sigma(F^2^) is used only for calculating R-factors(gt) etc. and is 
 not relevant to the choice of reflections for refinement.  R-factors based 
 on F^2^ are statistically about twice as large as those based on F, and R- 
 factors based on ALL data will be even larger. 
; 
 
_refine_ls_structure_factor_coef  Fsqd  
_refine_ls_matrix_type            full 
_refine_ls_weighting_scheme       calc  
_refine_ls_weighting_details 
 'calc w=1/[\s^2^(Fo^2^)+(0.0665P)^2^+1.1634P] where P=(Fo^2^+2Fc^2^)/3' 
_atom_sites_solution_primary      direct 
_atom_sites_solution_secondary    difmap 
_atom_sites_solution_hydrogens    geom 
_refine_ls_hydrogen_treatment     mixed 
_refine_ls_extinction_method      none 
_refine_ls_extinction_coef        ? 
_refine_ls_number_reflns          10449 
_refine_ls_number_parameters      523 
_refine_ls_number_restraints      0 
_refine_ls_R_factor_all           0.0935 
_refine_ls_R_factor_gt            0.0628 
_refine_ls_wR_factor_ref          0.1735 
_refine_ls_wR_factor_gt           0.1550 
_refine_ls_goodness_of_fit_ref    1.052 
_refine_ls_restrained_S_all       1.052 
_refine_ls_shift/su_max           0.003 
_refine_ls_shift/su_mean          0.000 
 
loop_ 
 _atom_site_label 
 _atom_site_type_symbol 
 _atom_site_fract_x 
 _atom_site_fract_y 
 _atom_site_fract_z 
 _atom_site_U_iso_or_equiv 
 _atom_site_adp_type 
 _atom_site_occupancy 
 _atom_site_symmetry_multiplicity 
 _atom_site_calc_flag 
 _atom_site_refinement_flags 
 _atom_site_disorder_assembly 
 _atom_site_disorder_group 
C10 C 0.6015(3) 0.55855(17) 0.11821(13) 0.0404(5) Uani 1 1 d . . . 
C9 C 0.4702(2) 0.80804(17) 0.24979(13) 0.0373(4) Uani 1 1 d . . . 
C12 C 0.8822(3) 0.73280(19) 0.30679(14) 0.0457(5) Uani 1 1 d . . . 
H12 H 0.8333 0.7776 0.3449 0.055 Uiso 1 1 calc R . . 
C14 C 0.9696(2) 0.56251(17) 0.25447(12) 0.0362(4) Uani 1 1 d . . . 
C11 C 0.9428(3) 0.76817(18) 0.24437(14) 0.0434(5) Uani 1 1 d . . . 
H11 H 0.9343 0.8368 0.2419 0.052 Uiso 1 1 calc R . . 
C13 C 0.8952(3) 0.63258(18) 0.31157(13) 0.0421(5) Uani 1 1 d . . . 
H13 H 0.8543 0.6097 0.3531 0.051 Uiso 1 1 calc R . . 
C17 C 1.1086(2) 0.52737(17) 0.13498(13) 0.0387(5) Uani 1 1 d . . . 
H17 H 1.1494 0.5489 0.0928 0.046 Uiso 1 1 calc R . . 
C18 C 1.0721(3) 0.74495(18) 0.11989(15) 0.0466(5) Uani 1 1 d . . . 
C16 C 1.0146(2) 0.70363(17) 0.18674(13) 0.0381(5) Uani 1 1 d . . . 
C15 C 1.0313(2) 0.59764(16) 0.19039(12) 0.0347(4) Uani 1 1 d . . . 
C19 C 0.4049(3) 0.98984(17) 0.32072(14) 0.0412(5) Uani 1 1 d . . . 
C21 C 0.5507(3) 0.95570(17) 0.20239(13) 0.0409(5) Uani 1 1 d . . . 
C20 C 0.4797(3) 0.91693(17) 0.25753(13) 0.0387(5) Uani 1 1 d . . . 
C23 C 1.0604(3) 0.39278(17) 0.20567(13) 0.0387(5) Uani 1 1 d . . . 
C22 C 1.1234(2) 0.42851(17) 0.14321(13) 0.0375(5) Uani 1 1 d . . . 
C25 C 0.9103(3) 0.41556(17) 0.32257(13) 0.0391(5) Uani 1 1 d . . . 
C24 C 0.9851(2) 0.45799(17) 0.26105(12) 0.0372(5) Uani 1 1 d . . . 
C26 C 0.4825(3) 1.04698(17) 0.39620(14) 0.0410(5) Uani 1 1 d . . . 
C27 C 0.6473(3) 1.03448(19) 0.42109(14) 0.0465(5) Uani 1 1 d . . . 
C28 C 0.4034(3) 1.11794(19) 0.44771(16) 0.0505(6) Uani 1 1 d . . . 
H28 H 0.4543 1.1556 0.4978 0.061 Uiso 1 1 calc R . . 
C30 C 0.1756(3) 1.0784(2) 0.35194(18) 0.0588(7) Uani 1 1 d . . . 
H30 H 0.0734 1.0890 0.3367 0.071 Uiso 1 1 calc R . . 
C29 C 0.2520(3) 1.0070(2) 0.30000(16) 0.0525(6) Uani 1 1 d . . . 
H29 H 0.1995 0.9697 0.2502 0.063 Uiso 1 1 calc R . . 
C31 C 0.2519(3) 1.1334(2) 0.42598(18) 0.0584(7) Uani 1 1 d . . . 
H31 H 0.2012 1.1809 0.4612 0.070 Uiso 1 1 calc R . . 
C32 C 0.5734(3) 1.06792(19) 0.20378(17) 0.0549(7) Uani 1 1 d . . . 
H32A H 0.5993 1.1079 0.2602 0.066 Uiso 1 1 calc R . . 
H32B H 0.4827 1.0945 0.1777 0.066 Uiso 1 1 calc R . . 
O6 O 0.5899(2) 0.46244(13) 0.12721(11) 0.0591(5) Uani 1 1 d . . . 
O3 O 0.7038(2) 1.10685(14) 0.48774(11) 0.0564(5) Uani 1 1 d . . . 
O4 O 0.7234(2) 0.96892(18) 0.38823(13) 0.0796(7) Uani 1 1 d . . . 
C38 C 0.9870(3) 0.39814(16) 0.39729(13) 0.0380(5) Uani 1 1 d . . . 
C37 C 0.9069(3) 0.35345(19) 0.44803(14) 0.0456(5) Uani 1 1 d . . . 
H37 H 0.9575 0.3420 0.4976 0.055 Uiso 1 1 calc R . . 
C39 C 1.1526(3) 0.42519(18) 0.42284(14) 0.0430(5) Uani 1 1 d . . . 
C34 C 0.7564(3) 0.3867(2) 0.30153(15) 0.0481(6) Uani 1 1 d . . . 
H34 H 0.7042 0.3975 0.2521 0.058 Uiso 1 1 calc R . . 
C36 C 0.7550(3) 0.3262(2) 0.42604(16) 0.0518(6) Uani 1 1 d . . . 
H36 H 0.7034 0.2971 0.4608 0.062 Uiso 1 1 calc R . . 
C35 C 0.6791(3) 0.3421(2) 0.35260(16) 0.0525(6) Uani 1 1 d . . . 
H35 H 0.5765 0.3230 0.3372 0.063 Uiso 1 1 calc R . . 
O10 O 1.20832(19) 0.38535(14) 0.48777(11) 0.0535(4) Uani 1 1 d . . . 
O9 O 1.2290(2) 0.47494(18) 0.39168(12) 0.0732(6) Uani 1 1 d . . . 
O8 O 1.0651(3) 0.84470(15) 0.13066(13) 0.0778(7) Uani 1 1 d . . . 
O7 O 1.1121(5) 0.69650(19) 0.05910(17) 0.1289(13) Uani 1 1 d . . . 
O12 O 1.2356(3) 0.15300(14) 0.09975(12) 0.0681(6) Uani 1 1 d . . . 
O13 O 1.3826(2) 0.28745(17) 0.20666(13) 0.0713(6) Uani 1 1 d . . . 
O11 O 0.6636(3) 0.57862(15) 0.06398(13) 0.0765(7) Uani 1 1 d . . . 
C42 C 0.6628(4) 0.3862(2) 0.07104(18) 0.0638(8) Uani 1 1 d . . . 
H42A H 0.6472 0.3198 0.0826 0.096 Uiso 1 1 calc R . . 
H42B H 0.7698 0.4030 0.0784 0.096 Uiso 1 1 calc R . . 
H42C H 0.6197 0.3851 0.0149 0.096 Uiso 1 1 calc R . . 
C41 C 1.3687(3) 0.4025(2) 0.51665(19) 0.0645(7) Uani 1 1 d . . . 
H41A H 1.3957 0.3709 0.5627 0.097 Uiso 1 1 calc R . . 
H41B H 1.3924 0.4750 0.5339 0.097 Uiso 1 1 calc R . . 
H41C H 1.4250 0.3731 0.4726 0.097 Uiso 1 1 calc R . . 
C40 C 0.8641(3) 1.1061(3) 0.5163(2) 0.0695(8) Uani 1 1 d . . . 
H40A H 0.8911 1.1610 0.5643 0.104 Uiso 1 1 calc R . . 
H40B H 0.9205 1.1153 0.4731 0.104 Uiso 1 1 calc R . . 
H40C H 0.8876 1.0416 0.5306 0.104 Uiso 1 1 calc R . . 
C43 C 1.1244(5) 0.8917(2) 0.0702(2) 0.0809(10) Uani 1 1 d . . . 
H43A H 1.1126 0.9645 0.0844 0.121 Uiso 1 1 calc R . . 
H43B H 1.0697 0.8637 0.0161 0.121 Uiso 1 1 calc R . . 
H43C H 1.2303 0.8779 0.0702 0.121 Uiso 1 1 calc R . . 
C44 C 1.2056(3) 0.34832(18) 0.08898(14) 0.0461(5) Uani 1 1 d . . . 
H44A H 1.2985 0.3772 0.0771 0.055 Uiso 1 1 calc R . . 
H44B H 1.1417 0.3185 0.0371 0.055 Uiso 1 1 calc R . . 
C45 C 1.0863(3) 0.28147(18) 0.20459(16) 0.0502(6) Uani 1 1 d . . . 
H45A H 0.9982 0.2385 0.1758 0.060 Uiso 1 1 calc R . . 
H45B H 1.1092 0.2705 0.2605 0.060 Uiso 1 1 calc R . . 
S1 S 1.24564(7) 0.25561(5) 0.14992(4) 0.04720(16) Uani 1 1 d . . . 
S2 S 0.72697(11) 1.07041(5) 0.14612(6) 0.0746(3) Uani 1 1 d . . . 
C4 C 0.5357(2) 0.74122(16) 0.18526(12) 0.0345(4) Uani 1 1 d . . . 
C5 C 0.5287(2) 0.63258(16) 0.18150(13) 0.0373(4) Uani 1 1 d . . . 
C3 C 0.6071(3) 0.78549(17) 0.12969(13) 0.0397(5) Uani 1 1 d . . . 
H3 H 0.6501 0.7434 0.0873 0.048 Uiso 1 1 calc R . . 
C2 C 0.6132(3) 0.88929(17) 0.13787(13) 0.0403(5) Uani 1 1 d . . . 
C8 C 0.3984(3) 0.76506(18) 0.30587(14) 0.0436(5) Uani 1 1 d . . . 
H8 H 0.3551 0.8082 0.3476 0.052 Uiso 1 1 calc R . . 
C6 C 0.4581(3) 0.59567(18) 0.23816(14) 0.0434(5) Uani 1 1 d . . . 
H6 H 0.4544 0.5254 0.2355 0.052 Uiso 1 1 calc R . . 
C7 C 0.3914(3) 0.66166(19) 0.29989(14) 0.0467(5) Uani 1 1 d . . . 
H7 H 0.3424 0.6348 0.3368 0.056 Uiso 1 1 calc R . . 
C1 C 0.6883(4) 0.94455(19) 0.08345(17) 0.0574(7) Uani 1 1 d . . . 
H1A H 0.6208 0.9458 0.0329 0.069 Uiso 1 1 calc R . . 
H1B H 0.7814 0.9123 0.0691 0.069 Uiso 1 1 calc R . . 
O1 O 0.7118(5) 1.14576(19) 0.0986(2) 0.1353(14) Uani 1 1 d . . . 
O2 O 0.8708(3) 1.0702(2) 0.2017(2) 0.1125(10) Uani 1 1 d . . . 
 
loop_ 
 _atom_site_aniso_label 
 _atom_site_aniso_U_11 
 _atom_site_aniso_U_22 
 _atom_site_aniso_U_33 
 _atom_site_aniso_U_23 
 _atom_site_aniso_U_13 
 _atom_site_aniso_U_12 
C10 0.0481(13) 0.0333(11) 0.0394(11) 0.0097(9) 0.0021(9) 0.0027(9) 
C9 0.0396(11) 0.0379(11) 0.0347(10) 0.0080(9) 0.0060(8) 0.0007(9) 
C12 0.0490(13) 0.0428(13) 0.0436(12) 0.0033(10) 0.0107(10) 0.0099(10) 
C14 0.0368(11) 0.0386(11) 0.0333(10) 0.0080(8) 0.0053(8) 0.0034(9) 
C11 0.0471(13) 0.0357(11) 0.0457(12) 0.0079(10) 0.0028(10) 0.0048(10) 
C13 0.0475(13) 0.0435(12) 0.0360(10) 0.0080(9) 0.0093(9) 0.0048(10) 
C17 0.0436(12) 0.0409(12) 0.0354(10) 0.0139(9) 0.0100(9) 0.0036(9) 
C18 0.0627(15) 0.0365(12) 0.0433(12) 0.0131(10) 0.0098(11) 0.0055(11) 
C16 0.0396(11) 0.0379(11) 0.0370(10) 0.0107(9) 0.0017(9) 0.0016(9) 
C15 0.0360(11) 0.0344(10) 0.0338(10) 0.0095(8) 0.0024(8) 0.0024(8) 
C19 0.0489(13) 0.0352(11) 0.0424(11) 0.0093(9) 0.0157(10) 0.0043(10) 
C21 0.0490(13) 0.0348(11) 0.0415(11) 0.0102(9) 0.0124(9) 0.0039(9) 
C20 0.0444(12) 0.0348(11) 0.0366(10) 0.0058(9) 0.0083(9) 0.0035(9) 
C23 0.0443(12) 0.0369(11) 0.0368(10) 0.0092(9) 0.0101(9) 0.0024(9) 
C22 0.0398(11) 0.0391(11) 0.0347(10) 0.0088(9) 0.0085(8) 0.0044(9) 
C25 0.0477(13) 0.0355(11) 0.0366(10) 0.0083(9) 0.0141(9) 0.0050(9) 
C24 0.0418(12) 0.0385(11) 0.0335(10) 0.0107(9) 0.0086(8) 0.0031(9) 
C26 0.0487(13) 0.0334(11) 0.0435(11) 0.0088(9) 0.0149(10) 0.0055(9) 
C27 0.0540(14) 0.0447(13) 0.0421(12) 0.0095(10) 0.0114(10) 0.0060(11) 
C28 0.0587(15) 0.0409(13) 0.0510(13) 0.0018(11) 0.0180(11) 0.0049(11) 
C30 0.0476(14) 0.0594(17) 0.0727(18) 0.0159(14) 0.0178(13) 0.0129(12) 
C29 0.0490(14) 0.0555(16) 0.0523(14) 0.0089(12) 0.0096(11) 0.0020(12) 
C31 0.0588(16) 0.0463(15) 0.0710(17) 0.0034(13) 0.0276(14) 0.0117(12) 
C32 0.0776(18) 0.0367(12) 0.0585(15) 0.0149(11) 0.0306(13) 0.0110(12) 
O6 0.0910(14) 0.0339(9) 0.0574(10) 0.0126(8) 0.0238(10) 0.0099(9) 
O3 0.0513(10) 0.0508(11) 0.0616(11) 0.0020(9) 0.0062(8) -0.0015(8) 
O4 0.0679(13) 0.0862(16) 0.0693(13) -0.0122(11) 0.0018(10) 0.0361(12) 
C38 0.0446(12) 0.0332(11) 0.0379(10) 0.0082(9) 0.0113(9) 0.0023(9) 
C37 0.0512(14) 0.0478(13) 0.0432(12) 0.0193(10) 0.0112(10) 0.0021(11) 
C39 0.0488(13) 0.0403(12) 0.0406(11) 0.0069(10) 0.0122(10) -0.0005(10) 
C34 0.0469(13) 0.0551(15) 0.0442(12) 0.0144(11) 0.0077(10) 0.0027(11) 
C36 0.0514(15) 0.0534(15) 0.0588(14) 0.0228(12) 0.0202(12) -0.0011(11) 
C35 0.0422(13) 0.0584(16) 0.0590(15) 0.0150(12) 0.0116(11) -0.0033(11) 
O10 0.0442(9) 0.0599(11) 0.0620(10) 0.0271(9) 0.0044(8) 0.0032(8) 
O9 0.0607(12) 0.1036(17) 0.0628(12) 0.0390(12) 0.0032(9) -0.0288(12) 
O8 0.137(2) 0.0402(10) 0.0682(12) 0.0194(9) 0.0429(13) 0.0016(11) 
O7 0.262(4) 0.0565(14) 0.1058(19) 0.0398(14) 0.120(2) 0.0464(19) 
O12 0.0984(16) 0.0407(10) 0.0677(12) 0.0040(9) 0.0324(11) 0.0118(10) 
O13 0.0594(12) 0.0770(14) 0.0754(13) 0.0205(11) -0.0038(10) 0.0107(10) 
O11 0.1220(19) 0.0420(10) 0.0800(13) 0.0164(10) 0.0598(13) 0.0136(11) 
C42 0.090(2) 0.0411(14) 0.0588(16) 0.0065(12) 0.0136(15) 0.0187(14) 
C41 0.0462(15) 0.074(2) 0.0727(18) 0.0188(16) 0.0003(13) 0.0027(13) 
C40 0.0554(17) 0.073(2) 0.077(2) 0.0175(16) -0.0015(14) -0.0033(15) 
C43 0.129(3) 0.0530(18) 0.0706(19) 0.0261(15) 0.031(2) -0.0121(18) 
C44 0.0581(14) 0.0414(12) 0.0431(12) 0.0114(10) 0.0191(10) 0.0101(11) 
C45 0.0661(16) 0.0387(12) 0.0518(13) 0.0133(11) 0.0242(12) 0.0052(11) 
S1 0.0574(4) 0.0382(3) 0.0478(3) 0.0088(2) 0.0145(3) 0.0103(3) 
S2 0.1075(7) 0.0356(3) 0.0946(6) 0.0161(4) 0.0608(5) 0.0020(4) 
C4 0.0378(11) 0.0340(10) 0.0309(9) 0.0070(8) 0.0026(8) 0.0000(8) 
C5 0.0395(11) 0.0347(11) 0.0372(10) 0.0092(9) 0.0015(8) -0.0015(9) 
C3 0.0474(12) 0.0365(11) 0.0361(10) 0.0067(9) 0.0113(9) 0.0037(9) 
C2 0.0484(13) 0.0371(11) 0.0381(11) 0.0107(9) 0.0111(9) 0.0036(9) 
C8 0.0480(13) 0.0451(13) 0.0395(11) 0.0097(10) 0.0123(9) 0.0015(10) 
C6 0.0460(13) 0.0381(12) 0.0470(12) 0.0137(10) 0.0036(10) -0.0034(10) 
C7 0.0495(14) 0.0498(14) 0.0456(12) 0.0181(11) 0.0123(10) -0.0034(11) 
C1 0.0829(19) 0.0429(14) 0.0559(14) 0.0163(11) 0.0336(14) 0.0076(13) 
O1 0.250(4) 0.0535(14) 0.148(3) 0.0514(16) 0.140(3) 0.0398(18) 
O2 0.0645(16) 0.101(2) 0.155(3) -0.0090(19) 0.0176(17) -0.0223(14) 
 
_geom_special_details 
; 
 All esds (except the esd in the dihedral angle between two l.s. planes) 
 are estimated using the full covariance matrix.  The cell esds are taken 
 into account individually in the estimation of esds in distances, angles 
 and torsion angles; correlations between esds in cell parameters are only 
 used when they are defined by crystal symmetry.  An approximate (isotropic) 
 treatment of cell esds is used for estimating esds involving l.s. planes. 
; 
 
loop_ 
 _geom_bond_atom_site_label_1 
 _geom_bond_atom_site_label_2 
 _geom_bond_distance 
 _geom_bond_site_symmetry_2 
 _geom_bond_publ_flag 
C10 O11 1.198(3) . ? 
C10 O6 1.329(3) . ? 
C10 C5 1.500(3) . ? 
C9 C8 1.416(3) . ? 
C9 C20 1.432(3) . ? 
C9 C4 1.433(3) . ? 
C12 C13 1.363(3) . ? 
C12 C11 1.401(3) . ? 
C14 C13 1.419(3) . ? 
C14 C15 1.428(3) . ? 
C14 C24 1.430(3) . ? 
C11 C16 1.374(3) . ? 
C17 C22 1.363(3) . ? 
C17 C15 1.418(3) . ? 
C18 O7 1.178(3) . ? 
C18 O8 1.308(3) . ? 
C18 C16 1.494(3) . ? 
C16 C15 1.438(3) . ? 
C19 C29 1.388(3) . ? 
C19 C26 1.406(3) . ? 
C19 C20 1.501(3) . ? 
C21 C20 1.369(3) . ? 
C21 C2 1.417(3) . ? 
C21 C32 1.505(3) . ? 
C23 C24 1.373(3) . ? 
C23 C22 1.414(3) . ? 
C23 C45 1.503(3) . ? 
C22 C44 1.506(3) . ? 
C25 C34 1.393(3) . ? 
C25 C38 1.404(3) . ? 
C25 C24 1.500(3) . ? 
C26 C28 1.396(3) . ? 
C26 C27 1.487(3) . ? 
C27 O4 1.194(3) . ? 
C27 O3 1.338(3) . ? 
C28 C31 1.374(4) . ? 
C30 C31 1.375(4) . ? 
C30 C29 1.390(4) . ? 
C32 S2 1.777(3) . ? 
O6 C42 1.447(3) . ? 
O3 C40 1.440(3) . ? 
C38 C37 1.399(3) . ? 
C38 C39 1.492(3) . ? 
C37 C36 1.373(4) . ? 
C39 O9 1.188(3) . ? 
C39 O10 1.347(3) . ? 
C34 C35 1.388(3) . ? 
C36 C35 1.375(4) . ? 
O10 C41 1.440(3) . ? 
O8 C43 1.451(3) . ? 
O12 S1 1.4356(19) . ? 
O13 S1 1.434(2) . ? 
C44 S1 1.776(2) . ? 
C45 S1 1.782(2) . ? 
S2 O1 1.409(3) . ? 
S2 O2 1.473(3) . ? 
S2 C1 1.777(3) . ? 
C4 C3 1.416(3) . ? 
C4 C5 1.439(3) . ? 
C5 C6 1.376(3) . ? 
C3 C2 1.363(3) . ? 
C2 C1 1.505(3) . ? 
C8 C7 1.363(3) . ? 
C6 C7 1.402(3) . ? 
 
loop_ 
 _geom_angle_atom_site_label_1 
 _geom_angle_atom_site_label_2 
 _geom_angle_atom_site_label_3 
 _geom_angle 
 _geom_angle_site_symmetry_1 
 _geom_angle_site_symmetry_3 
 _geom_angle_publ_flag 
O11 C10 O6 120.9(2) . . ? 
O11 C10 C5 126.8(2) . . ? 
O6 C10 C5 112.32(19) . . ? 
C8 C9 C20 120.88(19) . . ? 
C8 C9 C4 119.2(2) . . ? 
C20 C9 C4 119.93(18) . . ? 
C13 C12 C11 119.9(2) . . ? 
C13 C14 C15 119.3(2) . . ? 
C13 C14 C24 120.84(19) . . ? 
C15 C14 C24 119.90(18) . . ? 
C16 C11 C12 121.4(2) . . ? 
C12 C13 C14 121.3(2) . . ? 
C22 C17 C15 120.32(19) . . ? 
O7 C18 O8 119.8(2) . . ? 
O7 C18 C16 126.5(2) . . ? 
O8 C18 C16 113.5(2) . . ? 
C11 C16 C15 120.1(2) . . ? 
C11 C16 C18 119.0(2) . . ? 
C15 C16 C18 120.92(19) . . ? 
C17 C15 C14 118.63(19) . . ? 
C17 C15 C16 123.36(19) . . ? 
C14 C15 C16 117.99(19) . . ? 
C29 C19 C26 118.4(2) . . ? 
C29 C19 C20 117.4(2) . . ? 
C26 C19 C20 124.0(2) . . ? 
C20 C21 C2 120.7(2) . . ? 
C20 C21 C32 125.5(2) . . ? 
C2 C21 C32 113.83(19) . . ? 
C21 C20 C9 119.21(19) . . ? 
C21 C20 C19 118.64(19) . . ? 
C9 C20 C19 122.02(19) . . ? 
C24 C23 C22 120.5(2) . . ? 
C24 C23 C45 125.61(19) . . ? 
C22 C23 C45 113.85(19) . . ? 
C17 C22 C23 121.32(19) . . ? 
C17 C22 C44 124.70(19) . . ? 
C23 C22 C44 113.98(19) . . ? 
C34 C25 C38 118.3(2) . . ? 
C34 C25 C24 117.3(2) . . ? 
C38 C25 C24 124.3(2) . . ? 
C23 C24 C14 119.27(19) . . ? 
C23 C24 C25 118.96(19) . . ? 
C14 C24 C25 121.59(18) . . ? 
C28 C26 C19 119.1(2) . . ? 
C28 C26 C27 119.7(2) . . ? 
C19 C26 C27 121.1(2) . . ? 
O4 C27 O3 122.3(2) . . ? 
O4 C27 C26 126.3(2) . . ? 
O3 C27 C26 111.4(2) . . ? 
C31 C28 C26 121.5(2) . . ? 
C31 C30 C29 119.7(3) . . ? 
C19 C29 C30 121.6(2) . . ? 
C28 C31 C30 119.7(2) . . ? 
C21 C32 S2 103.47(16) . . ? 
C10 O6 C42 116.2(2) . . ? 
C27 O3 C40 117.0(2) . . ? 
C37 C38 C25 119.3(2) . . ? 
C37 C38 C39 119.6(2) . . ? 
C25 C38 C39 121.15(19) . . ? 
C36 C37 C38 121.3(2) . . ? 
O9 C39 O10 122.7(2) . . ? 
O9 C39 C38 126.3(2) . . ? 
O10 C39 C38 111.01(19) . . ? 
C35 C34 C25 121.5(2) . . ? 
C37 C36 C35 119.9(2) . . ? 
C36 C35 C34 119.7(2) . . ? 
C39 O10 C41 116.6(2) . . ? 
C18 O8 C43 117.1(2) . . ? 
C22 C44 S1 103.24(15) . . ? 
C23 C45 S1 103.13(15) . . ? 
O13 S1 O12 117.64(13) . . ? 
O13 S1 C44 108.98(13) . . ? 
O12 S1 C44 111.83(12) . . ? 
O13 S1 C45 109.05(13) . . ? 
O12 S1 C45 111.58(12) . . ? 
C44 S1 C45 95.49(11) . . ? 
O1 S2 O2 117.9(2) . . ? 
O1 S2 C32 112.30(16) . . ? 
O2 S2 C32 108.62(17) . . ? 
O1 S2 C1 111.88(17) . . ? 
O2 S2 C1 108.22(16) . . ? 
C32 S2 C1 95.54(12) . . ? 
C3 C4 C9 118.45(19) . . ? 
C3 C4 C5 123.32(19) . . ? 
C9 C4 C5 118.21(18) . . ? 
C6 C5 C4 119.8(2) . . ? 
C6 C5 C10 119.1(2) . . ? 
C4 C5 C10 121.13(18) . . ? 
C2 C3 C4 120.5(2) . . ? 
C3 C2 C21 121.2(2) . . ? 
C3 C2 C1 125.0(2) . . ? 
C21 C2 C1 113.8(2) . . ? 
C7 C8 C9 121.2(2) . . ? 
C5 C6 C7 121.5(2) . . ? 
C8 C7 C6 120.1(2) . . ? 
C2 C1 S2 103.42(16) . . ? 
 
_diffrn_measured_fraction_theta_max    0.825 
_diffrn_reflns_theta_full              31.43 
_diffrn_measured_fraction_theta_full   0.825 
_refine_diff_density_max    0.942 
_refine_diff_density_min   -0.842 
_refine_diff_density_rms    0.052 
